# Supplementary material for: General practitioners’ perceptions towards the use of digital health services for citizens in primary care: a qualitative interview study
Source: PubMed Central journal article supplement — BMJ Open. 2019 May 5;9(5):e028251. doi: 10.1136/bmjopen-2018-028251 (PMC6502059; doi:10.1136/bmjopen-2018-028251), 2019-05-05
Supplement: bmjopen-2018-028251.draft_revisions.pdf [file bmjopen-2018-028251.draft_revisions.pdf]

# BMJ Open

BMJ Open is committed to open peer review. As part of this commitment we make the peer review history of every article we publish publicly available.

When an article is published we post the peer reviewers' comments and the authors' responses online. We also post the versions of the paper that were used during peer review. These are the versions that the peer review comments apply to.

The versions of the paper that follow are the versions that were submitted during the peer review process. They are not the versions of record or the final published versions. They should not be cited or distributed as the published version of this manuscript.

BMJ Open is an open access journal and the full, final, typeset and author-corrected version of record of the manuscript is available on our site with no access controls, subscription charges or pay-per-view fees (<http://bmjopen.bmj.com>).

If you have any questions on BMJ Open's open peer review process please email [info.bmjopen@bmj.com](mailto:info.bmjopen@bmj.com)

# BMJ Open

## General practitioners' perceptions towards use of digital health services for citizens in primary care: a qualitative interview study

|                               |                                                                                                                                                                                           |
|-------------------------------|-------------------------------------------------------------------------------------------------------------------------------------------------------------------------------------------|
| Journal:                      | <i>BMJ Open</i>                                                                                                                                                                           |
| Manuscript ID                 | bmjopen-2018-028251                                                                                                                                                                       |
| Article Type:                 | Research                                                                                                                                                                                  |
| Date Submitted by the Author: | 30-Nov-2018                                                                                                                                                                               |
| Complete List of Authors:     | Fagerlund, Asbjørn Johansen; Norwegian Centre for E-health Research, Holm, Inger Marie; Norwegian Centre for E-health Research<br>Zanaboni, Paolo; Norwegian Centre for E-health Research |
| Keywords:                     | Telemedicine < BIOTECHNOLOGY & BIOINFORMATICS, World Wide Web technology < BIOTECHNOLOGY & BIOINFORMATICS, PRIMARY CARE, QUALITATIVE RESEARCH                                             |
|                               |                                                                                                                                                                                           |

SCHOLARONE™  
Manuscripts

1  
2  
3 **General practitioners' perceptions towards use of digital health**  
4 **services for citizens in primary care: a qualitative interview study**  
5  
6  
7  
8  
9  
10  
11

12 Asbjørn Johansen Fagerlund, Ph.D. [Asbjorn.Johansen.Fagerlund@ehealthresearch.no](mailto:Asbjorn.Johansen.Fagerlund@ehealthresearch.no)

13  
14 Researcher, Norwegian Centre for E-health Research, P.O Box 35, N-9038 Tromsø, NORWAY  
15  
16  
17

18  
19 Inger Marie Holm, Ph.D. [Inger.Marie.Holm@ehealthresearch.no](mailto:Inger.Marie.Holm@ehealthresearch.no)

20  
21 Researcher, Norwegian Centre for E-health Research, P.O Box 35, N-9038 Tromsø, NORWAY  
22  
23  
24

25  
26 Paolo Zanaboni, Ph.D. [Paolo.Zanaboni@ehealthresearch.no](mailto:Paolo.Zanaboni@ehealthresearch.no)

27  
28 Senior researcher, Norwegian Centre for E-health Research, P.O Box 35, N-9038 Tromsø,  
29 NORWAY  
30  
31  
32

33  
34 **Corresponding author:**

35  
36 Asbjørn Johansen Fagerlund

37  
38 [Asbjorn.Johansen.Fagerlund@ehealthresearch.no](mailto:Asbjorn.Johansen.Fagerlund@ehealthresearch.no)

39  
40  
41 Researcher, Norwegian Centre for E-health Research, P.O Box 35, N-9038 Tromsø,  
42 NORWAY  
43

44  
45 +47 97604709  
46  
47  
48

49  
50 Word count: 4083, from introduction to discussion, excluding table. Health e-mail

51  
52 Key words: Telemedicine, WWW technology, Primary care, qualitative research.  
53  
54  
55  
56  
57  
58  
59  
60

## Abstract

### *Objectives*

To explore GPs' perceptions towards use of digital health services for citizens.

### *Design*

A qualitative study based on semi-structured interviews.

### *Setting*

Primary Care

### *Participants*

Nine GPs from that were early adopters of the four services were interviewed.

### *Method*

One moderator presented topics using open-ended questions, facilitated the discussion and followed up with further questions. Phone interviews were conducted, audio recorded and transcribed verbatim. Qualitative data were analysed using the Framework Method.

### *Results*

The use of digital services in primary care in Norway is growing, though use of text-based e-consultations is still limited. Most GPs were positive to all four services, but there was still some scepticism regarding the effects. Advantages for GP offices included reduced phone load, increased efficiency, released time for medical assessments, less crowded waiting rooms and more precise communication. Benefits for patients were increased flexibility and autonomy, time and money savings. Children, elderly and people with low computer literacy might still need traditional alternatives.

### *Conclusions*

More defined and standardized routines, as well as more evidence of the effects, are necessary for large-scale adoption.

## **Strengths and limitations of this study**

### Strengths:

- The study investigates technology implementation in general practice.
- Rigorous application of qualitative framework theory.

- 1  
2  
3 - The results sheds light upon themes that are relevant for clinicians and policy  
4 makers.  
5

6  
7 Limitations:

- 8  
9 - All GPs that participated in the study were voluntary early adopters, and thus  
10 possibly more positive and competent with technology than the general GP  
11 population.  
12  
13  
14  
15

16  
17 **Introduction**

18 The general practitioners' (GP) scheme is a central component in the Norwegian primary health  
19 care system. All GPs participating in this study are included in the GP scheme, meaning that  
20 they are private practitioners who have established a contractual agreement with the  
21 municipality in which their practice serves the population. Primary health services in Norway  
22 are financed through a variety of grants and reimbursements from the public sector, and out-of-  
23 pocket payments (1). In an effort to provide the citizens with a uniform portal for  
24 communicating with their GP, the Norwegian Directorate for e-health has developed the  
25 «Digital dialogue with the general practitioner», a suite of four online services. By July 2018,  
26 these services were offered by 186 GP offices, which were part of the public GP scheme (4732  
27 GPs working in 1542 offices), in order to obtain user experiences before large-scale  
28 deployment. The four digital services are accessible to citizens from the private section of the  
29 national portal helsenorge.no. They are available after login and include:  
30  
31  
32  
33  
34  
35  
36  
37  
38

39 1: an electronic booking service to make reservations with the GP

40  
41 2: an electronic prescription service to request renewal of maintenance drugs, with direct  
42 integration with the electronic prescription system of pharmacies  
43  
44

45 3: a service for text-based non-clinical enquiries to the GP office (e.g. opening hours, results  
46 from diagnostic tests) 4: a service for electronic consultation (e-consultation) with the GP.  
47  
48

49 The first three services are mainly administrative, geared towards introducing less time-  
50 consuming routines for both GP offices and patients, and free of charge for patients. E-  
51 consultation is a clinical service, which requires patients to pay the same out-of-pocket fee as  
52 for office visits. GPs are free to offer to patients all the four services or only some of them. The  
53 portion of the population with Internet access in Norway is very high, and almost total in the  
54 younger part of the population (2). It is therefore possible to assume that these electronic  
55 services have a large potential user base.  
56  
57  
58  
59  
60

1  
2  
3 Being the only clinical service in the suite, the e-consultation service warrants a more detailed  
4 introduction. The service at offer in the present study conforms to the definition that e-  
5 consultation is an asynchronous, non-face-to-face consultation using a secure electronic  
6 communication platform (3), where the doctor answers clinical questions in a similar way to a  
7 standard consultation and answers are send electronically (4). The demand for services that  
8 enable digitally based communication between the patients and their GPs is not new, and has  
9 been around since the early days of the Internet (5). While the use of online services in health  
10 care is on the rise, it is unclear whether it is beneficiary to all socioeconomic segments of the  
11 population (6). E-consultations in primary care have been mostly used to increase access to  
12 specialist care (7-10). However, the proliferation of e-consultations and other digital health  
13 services used by citizens to communicate directly with their GPs are limited, and consequently  
14 the body of literature from which to draw direct comparisons is narrow.

15  
16  
17 The presented suite of digital health services for citizens has the potential to improve the  
18 accessibility and efficiency of primary health care. However, government and vendors have  
19 been criticized for being overly optimistic about the expected favourable outcomes from  
20 employing health informatics (11). In order to release some of the potential of health  
21 informatics systems, it has been argued that, among others, feature functionality, project  
22 management and user-related outcomes affect implementation outcomes (12). The aim of the  
23 present study was to explore GPs' perceptions towards use of digital health services for citizens  
24 in primary care. Three main research questions were addressed: 1) which routines were  
25 implemented by GPs who adopted digital health services for citizens? 2) Which were GPs'  
26 impressions on benefits and disadvantages of digital health services for citizens? 3) How did  
27 GPs use digital health services for citizens?

## 28 29 30 31 32 33 34 35 36 37 38 39 40 41 42 43 44 45 **Methods**

### 46 *Patient and Public involvement*

47  
48 The present study did not have patient involvement. The study did not require approval from  
49 the regional ethics committee (REK). All participants were voluntary medical professionals  
50 (GP). The results will be distributed to the study participants via e-mail mailing lists that  
51 includes both study participants and other GP that did use the four services.

### 52 53 54 55 56 57 58 *Data collection*

1  
2  
3 We conducted semi-structured interviews with GPs who adopted at least one of the four digital  
4 services. Some GPs adopted the services since their early introduction in 2015, some started  
5 using the services in 2016 while others adopted them only a few months before the present  
6 study was conducted. Interviews were conducted until data saturation was reached (13) for the  
7 main analytical categories.  
8  
9

10  
11  
12 A semi-structured interview guide was used to illustrate GPs perceptions towards use of digital  
13 health services for citizens. The interview guide was developed with a number of questions for  
14 each of the four digital health services, as well as with a few questions of more general nature.  
15 Some questions were previously tested in a pilot qualitative study on the use of e-consultations.  
16 Consequently, the content of the interview guide was modified to include the feedback collected  
17 during the pilot study.  
18  
19

20  
21  
22 One moderator (AJF) who did not have any relationship with the interviewees beforehand  
23 conducted the interviews. The moderator presented topics using the open-ended questions in  
24 the interview guide, facilitated the discussion and followed up with further questions. The  
25 interviewees could discuss freely about their experiences. The moderator also sought to  
26 summarise discussions around each topic to verify interpretations of the GPs answers. The  
27 interviews were conducted by phone due to long distances to GPs offices. Interviews were audio  
28 recorded and transcribed verbatim in Norwegian. Quotes relevant for this paper were translated  
29 into English.  
30  
31

### 32 33 34 35 36 37 *Data analysis* 38

39  
40 Data were analysed by a multidisciplinary research team consisting of three members (AJF,  
41 IMH, PZ) with background in psychology, social science and health technology. Qualitative  
42 data collected from the interviews were analysed using the Framework Method (14). After  
43 transcription of the audio recordings, a sample of two interviews were randomly selected to let  
44 the research team familiarise with the transcripts and develop initial impressions and potential  
45 ideas for codes. Transcripts were then thoroughly read and independently analysed by each  
46 member of the research team. Interesting segments of text were underlined and notes were made  
47 in the margins of the transcripts to describe the content of each passage with coding labels as  
48 well as with more detailed information supporting the interpretation of the results. The members  
49 of the research team later met to share the coding labels, which they had assigned to the two  
50 transcripts. Each passage was analysed to discuss why it was interpreted as meaningful and how  
51 it could be useful to address the research questions. The coding labels used to describe each  
52 passage were compared to find similarities in the interpretations of the content and to resolve  
53  
54  
55  
56  
57  
58  
59  
60

differences. Finally, a working analytical framework was developed around a set of codes explained by a short definition.

The remaining seven transcripts were then assigned to the three members of the research team and analysed using the analytical framework. New codes that were not included in the initial framework were assigned together with the already defined codes as additional impressions emerged. Regular team meetings were conducted during the process of analysing transcripts to discuss new codes, group together codes which were conceptually related and refine the initial analytical framework. The analytical framework was refined until no new codes were generated. The final analytical framework [Table 1] consisted of fifteen codes grouped into five categories, each including a brief explanatory description of their meaning.

The final analytical framework was applied to all the transcripts by assigning appropriate codes to each meaningful passage of text. Data were then summarised in a framework matrix using Microsoft Excel. The framework matrix consisted of one column per interviewee, and one row per code. A separate sheet was used for each of the four digital health services explored in this study. Data from transcripts were summarised using verbatim words and inserted into the corresponding cell in the framework matrix. The qualitative data included in the framework matrix were finally reviewed to make connections across interviewees and categories, identify common themes as well as individual differences (15). Results were summarised and presented separately for each of the four digital health services.

**Table 1.** Framework matrix.

|                                       |                                                        |
|---------------------------------------|--------------------------------------------------------|
| Use                                   |                                                        |
| Extent of use                         | The extent to which the service is used by the staff   |
| Inappropriate use                     | When the service is not used correctly                 |
| Suitable for                          | Situations for which the service is most useful        |
| Unsuitable for                        | Situations for which the service cannot be used        |
| Motivation and incentives             | Factors affecting users' motivation to use the service |
| Routines                              |                                                        |
| Doctor's office                       | How the office is organized around the service         |
| General practitioners and staff       | How the service is integrated into individual routines |
| Advantages                            |                                                        |
| Doctor's office                       | The main benefits for the staff of the doctor's office |
| Patients                              | The main benefits for the patients                     |
| Disadvantages                         |                                                        |
| Criticisms and potential improvements | Organizational problems regarding the service delivery |
| Technical challenges and limitations  | Technical problems regarding the service functionality |
| Time and efficiency                   | Impact of the service on the staff's productivity      |
| Economics                             | Economic impact of the service                         |
| Other issues                          |                                                        |
| Perceptions                           | Individual thoughts around the service                 |
| Written communication                 | Impact on the communication with patients              |

## Results

Nine GPs from different offices were interviewed in the period from September 2017 to November 2017. Each interview lasted from 30 to 60 minutes.

### *Electronic booking*

The amount of appointments available for electronic booking (e-booking) varied among practices. One GP office started with having all time slots open for e-booking. However, after a testing period, their practice was modified by maintaining some time slots not available for e-booking to have more flexibility for patients booking in person or by phone. Other GP offices decided to restrict specific time slots to meetings or administrative work. One GP office did not yet adopt e-booking due to limitations in managing different lists of patients for GPs of the same practice. The demand for e-booking was especially high among technology-oriented patients.

*«[...] sometimes there are time slots available for regular appointments, but not for e-booking»*

The extent to which e-booking was available also varied among GP offices. Some GPs published all time slots six months in advance, while others only one month ahead. Requests for emergency appointments were generally not available through the service.

Despite different routines, GPs agreed that e-booking had obvious benefits and perceived the service as effective and timesaving. Reduced phone load was emphasised as a significant gain. One GP office recorded a 25% drop in incoming calls. Consequently, the staff obtained more time available to other important tasks. Reduced phone load brought also benefits to less technology-oriented patients who prefer regular phone-booking. According to the GPs, patients considered e-booking useful and preferable to regular booking, mainly due to timesavings. Patients were also less dependent on GP offices' opening hours. Patients with a tight schedule experienced increased autonomy as they could easier book online an appointment fitting their schedule. GPs mentioned only a few disadvantages. Experience showed that e-booking was not suitable for everyone. Children, elderly, people not familiar with technology as well as some patients receiving psychiatric care were examples of patients who might require traditional booking alternatives. Moreover, GPs had less information on patient's reasons for requesting an appointment when the booking was made electronically.

GPs were generally satisfied about using e-booking for regular appointments, and were positive about the potential use for emergency appointments.

1  
2  
3       *«Doctors are generally sceptical about making emergency appointments available for e-*  
4       *booking, but we actually have a good experience with this. The service is seldom used*  
5       *improperly».*  
6  
7

8  
9 The users of e-booking pointed out a number of limitations. For instance, when GPs made  
10 changes, these were not updated and visible until the next day. Another drawback was the  
11 impossibility to filter unnecessary appointments in the same way as by phone, or modify the  
12 required time for appointments. One GP highlighted some challenges in using same day  
13 appointments, available for booking from 4 PM the day before.  
14  
15  
16

17  
18       *«It takes time for patients to understand this, so when looking for a time slot two days in*  
19       *advance, they do not find it. Then they try to book an appointment at another doctor,*  
20       *despite there will be many time slots available at their doctor. But we have always been*  
21       *concerned with explaining concepts and educating citizens in how to do this».*  
22  
23  
24

25 Improper use rarely occurred. When using e-booking, most patients generally booked single  
26 appointments, even if they might need a double appointment. GPs found it easier to clarify such  
27 matters by regular phone booking and missed the possibility for e-booking of double  
28 appointments. Another challenge mentioned was the inappropriate request for vaccination.  
29  
30  
31  
32  
33  
34

### 35 *Electronic prescription renewal*

36  
37 GPs adopted different procedures to handle electronic prescription (e-prescription) renewals.  
38 Some GP practices made new requests available in a common inbox that was checked daily,  
39 thus ensuring that renewals were processed even if the responsible GP was absent. One GP  
40 preferred to process all e-prescriptions by himself, while another interviewee delegated them to  
41 a medical secretary, except for cases of doubt. GPs processed requests between consultations  
42 or at the end of the day, sometimes requiring overtime work.  
43  
44  
45  
46  
47

48       *«In the way the GP scheme has been evolving, we may have ended up with more work in*  
49       *the evening».*  
50  
51

52 GPs mentioned a number of benefits of e-prescription, including fewer incoming calls,  
53 increased efficiency in administration and consequent released time for medical assessments,  
54 less pressure in the waiting room and in the GP office, improved dispatching priority and more  
55 precise communication.  
56  
57  
58  
59  
60

1  
2  
3 *«Fewer phone calls is probably the main advantage in addition to less hassle in notifying*  
4 *that a prescription is ready, for instance».*  
5  
6

7 Obvious advantages for patients were, according to GPs, time and money savings since they  
8 did not have to show up at the GP office to renew a prescription. However, one GP thought that  
9 it could become too easy to renew a prescription for patients who should have had a control  
10 visit. The service could potentially involve additional work for GPs if they need to explain  
11 patients why a renewal was refused, access their journal and look up former use of medication,  
12 or receive many prescription requests at the same time. Another GP thought that the interface  
13 was slow.  
14  
15  
16  
17  
18

19 *«The number of clicks and processes was somewhat easier - a bit easier than (the*  
20 *previously used) SMS-service. However, if you look at the doctor's work with managing*  
21 *the service in relation to attending patients, we use more time.»*  
22  
23  
24

25 The service was best suited to renewals for chronic patients on complex medications  
26 schemes.  
27  
28

29 *«E-prescribing [...] provides a much more complete overview of when patients took their*  
30 *medicine. This makes it easier for other doctors in the system to follow up».*  
31  
32

33 Some GPs believed the service could be an effective solution for “simple” infections, frequently  
34 prescribed medications such as benzodiazepine and sporadic medications such as painkillers  
35 and allergy medications. The GPs were somewhat divided regarding the prescription of  
36 potentially addictive medication.  
37  
38  
39

40 *«Ideally, addictive medications of benzodiazepine should not be renewed like this, but it*  
41 *depends on each situation».*  
42  
43

44 However, other GPs held a different position regarding medications used for long-term  
45 treatment.  
46  
47

48 *«Frequently prescribed medications taken daily for chronic diseases are renewed once*  
49 *every year at a yearly control. There we can see [...] if there is anything to change [...].*  
50 *Renewal by electronic prescription removes the possibility for adjustment. [...] it is best*  
51 *suited for those medications that are easy for people to keep control of and understand*  
52 *when they should consult their doctor if there is something that does not work well, such*  
53 *as recurrent urinary tract infections».*  
54  
55  
56  
57  
58  
59  
60

### *E-consultation*

The service was only used to a limited extent by the patients. GPs reported up to twice e-consultations per day, which occurred in the form of a dialogue between patient and GP. E-consultations were used for remote follow-up of health problems previously discussed during in-visits. Through an e-consultation, a GP could adjust a treatment, prescribe referrals or provide information. GPs could also assess, for example, signs of eczema upon receiving pictures electronically.

*«It should be a known problem, of medical nature, and regarding a known patient»*

GPs were in general satisfied about how much could be done without an office visit.

*«Far better than I thought, depending on how well the patient describes the problem [...] Perhaps 20-30% of the situations require personal attendance»*

There were, however, cases in which e-consultations could not be used. These included newly emerged clinical problems, which could not be assessed remotely, as well as requests for sick leaves. Despite the requirements for e-consultations being well described, patients were more likely to use the service if motivated directly from their GP.

A request for e-consultation must be replied within five days. Most GPs reported internal routines according to which, in case of delays, other GPs from the same practice could handle those requests. In case of absence, a substitute was always assigned and information on leaves was updated. Routines varied among individual GPs, even if belonging to the same practice: e-consultations were processed during the time between visits, at lunch, at the end of the day or during the evening.

*«It is often required some afternoon and evening work. I try to answer continuously so that all requests are processed before weekend. But if requests accumulate, I can reserve time in my schedule»*

Most GPs perceived a positive impact in terms of reduced workload for both receptionists and GPs, less crowded waiting rooms and fewer urgent visits. E-consultation was seen as a simple and secure communication channel with patients, especially those with a chronic condition. This enabled a more efficient exchange of information, which was also documented in the electronic patient journal.

*«Through an e-consultation it is much easier to enable a good dialogue around follow-up of health problems»*

1  
2  
3 Another benefit was improved patient follow-up via e-consultations due to the higher  
4 availability of the GPs. GPs also agreed that some patients managed to express more openly  
5 health issues through e-consultations.  
6  
7

8  
9 *«One patient wrote to me about issues he never told anyone before»*

10  
11 Despite the benefits of e-consultations, GPs mentioned that this service not always could  
12 replace regular visits. One limitation, for instance, was unclear communication.  
13

14  
15 *«Sometimes it is not possible to understand the patient»*

16  
17 Use of e-consultations could imply additional work, especially after traditional working hours.  
18 Another limitation was that GPs could not initiate an e-consultation.  
19

20  
21 *«E-consultations can only be initiated by the patient»*

22  
23 GPs were satisfied with the functionality of the platform, which made processing of e-  
24 consultations effective. A number of technical solutions were suggested to improve the service,  
25 such as the ability to process electronic transmission of files and images. GPs also  
26 recommended a feature to disable the service in their absence, and the possibility for patients  
27 to choose between different GPs. E-consultations via videoconferencing was seen as the next  
28 step.  
29  
30  
31  
32

33  
34 *«Perhaps we in the future can offer patients a videoconferencing service»*  
35  
36  
37

### 38 *Electronic contact with the GP office (e-contact)*

39  
40 Use of the service differed among GP offices. Those that had newly started using the service  
41 received only a few contacts daily, while others with a longer experience answered up to 20-30  
42 requests. The service was used to reschedule appointments, send answers for blood tests or  
43 digital imaging, provide information about vaccines, payments, or simple advices related to  
44 treatment. There were, however, situations of inappropriate use, especially when patients used  
45 electronic contacts with the GP office to address clinical questions. One reason might be related  
46 to unclear information regarding proper use. Another reason might be that, while this service  
47 was free of charge for patients, e-consultations had a fee. When such situations occurred, the  
48 office redirected the requests.  
49  
50  
51  
52  
53  
54

55  
56 E-contact with the GP office was used about as much as e-consultations. As the service was  
57 new, there were not yet established formal routines. Offices were still struggling in defining  
58  
59  
60

1  
2  
3 boundaries between e-contacts and e-consultations. With the purpose of making the service  
4 more efficient and standardised, patients' requests were categorised by the clinical staff.  
5  
6

7 The main advantage for the GP office consisted in a reduction of visits and phone contacts,  
8 which, in return, resulted in less waiting time for patients calling the office, as well as less  
9 workload for the clinical staff.  
10  
11

12  
13 *«I think it's easier to give an answer [...] It's quick, and it's done without mail or phone.*  
14 *Because if you call people then they will talk about more. Now you can send a short*  
15 *answer, so the frequency is actually increasing now. It makes it a little easier to follow*  
16 *up and keep a close dialogue»*  
17  
18  
19

20 Interviewees indicated that the service saved time for patients by avoiding unnecessary waiting  
21 time spent on the phone. Moreover, a less busy phone line had a positive impact on patients  
22 still in need to call the office. Another benefit was that, conversely to phone contacts, e-contacts  
23 were documentable.  
24  
25  
26

27 GPs were overall satisfied with the service and its functionalities. The only major limitation  
28 was related to uncertainties for patients on whether to use e-contact or e-consultation. In this  
29 respect, the service should be improved with more clear information.  
30  
31  
32

33 E-contacts were considered as an alternative to phone contacts. Consequently, this service had  
34 a high potential to increase efficiency and reduce workload. Younger patients with higher  
35 computer literacy could benefit more from this service.  
36  
37  
38

39 *«Someone will always use the phone instead of electronic contact, for instance older people.*  
40 *The younger population will probably like it, and I hope they will use it more»*  
41  
42

43 Finally, GPs were satisfied with the economic implications. The service did not require any  
44 additional cost, but it succeeded in releasing time for the health staff. The only concern was  
45 related to situations in which GPs provided answers to clinical requests without charging the  
46 fee for an e-consultation.  
47  
48  
49  
50  
51

## 52 **Discussion**

### 53 *Summary*

54  
55 Use of digital services for citizens in primary care in Norway is overall growing. Use of text-  
56 based e-consultations is in the early adoption phase and therefore in limited use.  
57  
58  
59  
60

1  
2  
3 Most GPs are positive to all services. Advantages for the GP office include reduced phone load,  
4 increased efficiency in administration and consequently more time for medical assessments,  
5 less crowded waiting rooms and more precise communication. Clear advantages for patients  
6 are ease of use, increased flexibility, increased autonomy, time and money savings.  
7  
8  
9

10 However, children, elderly, people not familiar with technology as well as some patients  
11 receiving psychiatric care were examples of patients who required traditional alternatives.  
12 There is still some scepticism regarding the effects in terms of efficiency and clinical utility for  
13 e-consultations.  
14  
15  
16

### 17 *Comparison with existing literature*

18  
19  
20 GPs perceptions towards e-booking and e-prescription renewal were almost entirely positive.  
21 Suggestions on how to improve the services included, for example, filtering of unnecessary  
22 bookings and possibility for e-booking of double appointments. Some GPs noted that the e-  
23 contact with the GP office was sometimes confused with e-consultations by the patients. This  
24 tendency was, however, not overwhelming. E-consultation was the only service entirely  
25 intended for clinical use. While the administrative services were implemented to a larger extent,  
26 the use of e-consultations by patients was still limited. Notably, some GPs expressed surprise  
27 that the clinical utility of e-consultations was better than expected. While it is demonstrated that  
28 written consultations between primary and specialist health have several benefits (7, 16), less  
29 is known about how text-based communication between GPs and patients affects clinical  
30 practice.  
31  
32  
33  
34  
35  
36  
37  
38

39 The experiences from early large-scale implementation in Sweden indicated that the use of  
40 digital services might increase over time after they are made available (17). In the present study,  
41 the initial volume of use for text-based e-consultations appeared to be limited. They also  
42 appeared to have little impact on demand for physical consultations, as the available  
43 appointments for physical consultations were still fully booked. Another study has pointed out  
44 that written communication between GP and patient can both supplement and replace physical  
45 consultations (18). In this study, however, an out-of-pocket fee was not charged for using the  
46 service, making a direct comparison with the service investigated in the present study  
47 questionable. The qualitative scope of the present study is not suited to detect non-obvious  
48 changes in demand and, consequently, cannot rule out the possibility that e-consultations  
49 affected physical consultations. Because of limited use from the patients, the need to implement  
50 new routines in the clinic in order to handle e-consultations were modest, and the requests were  
51 often processed between physical visits, at lunch or outside of regular office hours. It is likely  
52  
53  
54  
55  
56  
57  
58  
59  
60

1  
2  
3 that an increase in use of the service would require the implementation of more rigorous  
4 routines in the GPs offices, for example allocating a set portion of the office hours to the  
5 handling of electronic consultations.  
6  
7

### 8 *Strengths and limitations*

9  
10 This study employed a rigorous methodology for classifying and coding responses, reducing  
11 the impact of the authors' presumptions on the results. A limitation in this study was that the  
12 informants were recruited from a group of voluntary early adapters who may have been more  
13 enthusiastic than the general GP population. It is also possible that the informant group had  
14 higher technology proficiency or that they were less sensitive to annoyances than GPs at large.  
15  
16  
17  
18  
19

### 20 *Implications for research and/or practice*

21  
22 There were different routines among GP offices and even among individual GPs from the same  
23 practice. Organisational practices have a direct impact on the use of the service by GPs as well  
24 as on their perception of the effects. More experience is needed to standardise routines.  
25  
26  
27

28 More defined and standardised routines, as well as more evidence of the effects, are necessary  
29 for large-scale adoption of digital health services for citizens in primary care.  
30  
31

### 32 **Additional information**

33  
34 Funding: This study was funded by the Norwegian Centre for E-health Research as part of the  
35 project "Nytteeffektene av digitale helsetjenester".  
36  
37

38 Ethical approval: Not relevant.  
39

40 Competing interests: The authors declare no conflict of interests.  
41

42 Acknowledgements: We would like to thank the general practitioners sharing their valuable  
43 experiences as early adopters of the services.  
44  
45

46 Author statement: Fagerlund conducted the data collection. The authors Fagerlund, Holm and  
47 Zanaboni contributed equally in the analysis of the results and the preparation of the  
48 manuscript.  
49  
50  
51  
52  
53  
54  
55  
56  
57  
58  
59  
60

## References

1. Norwegian Directorate of Health, Norway and Health: an introduction. 2011.
2. SSB, Statistics Norway, Information technology use in households. 2016 [Available from: <https://www.ssb.no/teknologi-og-innovasjon/statistikker/ikthus/aar/2016-09-06>].
3. Olayiwola JN, Anderson D, Jepeal N, Aseltine R, Pickett C, Yan J, et al. Electronic consultations to improve the primary care-specialty care interface for cardiology in the medically underserved: a cluster-randomized controlled trial. *Ann Fam Med*. 2016;14(2):133-40.
4. Pecina JL, North F. Early e-consultation face-to-face conversions. *J Telemed Telecare*. 2016;22(5):269-76.
5. Ferguson T. Digital doctoring—opportunities and challenges in electronic patient-physician communication. *JAMA*. 1998;280(15):1361-2.
6. Miller EA, West DM. Where's the revolution? Digital technology and health care in the internet age. *J Health Polit Policy Law*. 2009;34(2):261-84.
7. Keely E, Liddy C, Afkham A. Utilization, benefits, and impact of an e-consultation service across diverse specialties and primary care providers. *Telemed J E Health*. 2013;19(10):733-8.
8. Liddy C, Maranger J, Afkham A, Keely E. Ten steps to establishing an e-consultation service to improve access to specialist care. *Telemed J E Health*. 2013;19(12):982-90.
9. North F, Uthke LD, Tulledge-Scheitel SM. Internal e-consultations in an integrated multispecialty practice: a retrospective review of use, content, and outcomes. *J Telemed Telecare*. 2015;21(3):151-9.
10. Tran C, Liddy C, Pinto N, Keely E. Impact of question content on e-consultation outcomes. *Telemed J E Health*. 2016;22(3):216-22.
11. Himmelstein DU, Woolhandler S. Hope and hype: predicting the impact of electronic medical records. *Health Aff*. 2005;24(5):1121-3.
12. Ludwick DA, Doucette J. Adopting electronic medical records in primary care: Lessons learned from health information systems implementation experience in seven countries. *Int J Med Inform*. 2009;78(1):22-31.
13. Saunders B, Sim J, Kingstone T, Baker S, Waterfield J, Bartlam B, et al. Saturation in qualitative research: exploring its conceptualization and operationalization. *Qual Quant*. 2018;52(4):1893-907.

- 1  
2  
3 14. Gale NK, Heath G, Cameron E, Rashid S, Redwood S. Using the framework method  
4 for the analysis of qualitative data in multi-disciplinary health research. *BMC Med Res*  
5 *Methodol.* 2013;13(1):117.  
6  
7  
8 15. Braun V, Clarke V. Using thematic analysis in psychology. *Qual Res Psychol.*  
9 2006;3(2):77-101.  
10  
11 16. Vimalananda VG, Gupte G, Seraj SM, Orlander J, Berlowitz D, Fincke BG, et al.  
12 Electronic consultations (e-consults) to improve access to specialty care: A systematic review  
13 and narrative synthesis. *J Telemed Telecare.* 2015;21(6):323-30.  
14  
15 17. Umefjord G, Sandström H, Malker H, Petersson G. Medical text-based consultations  
16 on the Internet: A 4-year study. *Int J Med Inform.* 2008;77(2):114-21.  
17  
18 18. Kummervold PE, Trondsen M, Andreassen H, Gammon D, Hjortdahl P. [Patient-  
19 physician interaction over the internet]. *Tidsskr Nor Laegeforen.* 2004;124(20):2633-6.  
20  
21  
22  
23  
24  
25  
26  
27  
28  
29  
30  
31  
32  
33  
34  
35  
36  
37  
38  
39  
40  
41  
42  
43  
44  
45  
46  
47  
48  
49  
50  
51  
52  
53  
54  
55  
56  
57  
58  
59  
60

# BMJ Open

## General practitioners' perceptions towards the use of digital health services for citizens in primary care: a qualitative interview study

|                                 |                                                                                                                                                                                           |
|---------------------------------|-------------------------------------------------------------------------------------------------------------------------------------------------------------------------------------------|
| Journal:                        | <i>BMJ Open</i>                                                                                                                                                                           |
| Manuscript ID                   | bmjopen-2018-028251.R1                                                                                                                                                                    |
| Article Type:                   | Research                                                                                                                                                                                  |
| Date Submitted by the Author:   | 19-Feb-2019                                                                                                                                                                               |
| Complete List of Authors:       | Fagerlund, Asbjørn Johansen; Norwegian Centre for E-health Research, Holm, Inger Marie; Norwegian Centre for E-health Research<br>Zanaboni, Paolo; Norwegian Centre for E-health Research |
| <b>Primary Subject Heading</b>: | Health services research                                                                                                                                                                  |
| Secondary Subject Heading:      | Communication, General practice / Family practice, Health informatics, Qualitative research                                                                                               |
| Keywords:                       | Telemedicine < BIOTECHNOLOGY & BIOINFORMATICS, World Wide Web technology < BIOTECHNOLOGY & BIOINFORMATICS, PRIMARY CARE, QUALITATIVE RESEARCH                                             |
|                                 |                                                                                                                                                                                           |

SCHOLARONE™  
Manuscripts

1  
2  
3 1 **General practitioners' perceptions towards the use of digital**  
4  
5 2 **health services for citizens in primary care: a qualitative interview**  
6  
7 3 **study**  
8  
9

10 4  
11  
12 5  
13  
14 6 Asbjørn Johansen Fagerlund, Ph.D. [Asbjorn.Johansen.Fagerlund@ehealthresearch.no](mailto:Asbjorn.Johansen.Fagerlund@ehealthresearch.no)

15 7 Researcher, Norwegian Centre for E-health Research, P.O Box 35, N-9038 Tromsø,  
16  
17 8 NORWAY  
18  
19  
20  
21 9

22  
23 10 Inger Marie Holm, Ph.D. [Inger.Marie.Holm@ehealthresearch.no](mailto:Inger.Marie.Holm@ehealthresearch.no)

24  
25 11 Researcher, Norwegian Centre for E-health Research, P.O Box 35, N-9038 Tromsø,  
26  
27 12 NORWAY  
28  
29  
30 13

31 14 Paolo Zanaboni, Ph.D. [Paolo.Zanaboni@ehealthresearch.no](mailto:Paolo.Zanaboni@ehealthresearch.no)

32  
33 15 Senior researcher, Norwegian Centre for E-health Research, P.O Box 35, N-9038 Tromsø,  
34  
35 16 NORWAY  
36  
37  
38 17

39  
40 18 **Corresponding author:**

41  
42 19 Asbjørn Johansen Fagerlund

43  
44 20 [Asbjorn.Johansen.Fagerlund@ehealthresearch.no](mailto:Asbjorn.Johansen.Fagerlund@ehealthresearch.no)

45  
46 21 Researcher, Norwegian Centre for E-health Research, P.O Box 35, N-9038 Tromsø,  
47  
48 22 NORWAY

49  
50 23 +47 97604709  
51  
52  
53 24

54  
55 25 Word count: 4083, from introduction to discussion, excluding table. Health e-mail

56  
57 26 Key words: Telemedicine, WWW technology, Primary care, qualitative research.  
58  
59  
60 27

1  
2  
3 1  
4  
5 2  
6  
7 3  
8  
9  
10 4  
11  
12 5  
13  
14 6  
15  
16 7  
17  
18 8  
19  
20 9  
21  
22 10  
23  
24 11  
25  
26 12  
27  
28 13  
29  
30 14  
31  
32 15  
33  
34 16  
35  
36 17  
37  
38 18  
39  
40 19  
41  
42 20  
43  
44 21  
45  
46 22  
47  
48 23  
49  
50 24  
51  
52 25  
53  
54 26  
55  
56 27  
57  
58 28  
59  
60 29  
30  
31  
32

## **Abstract**

### *Objectives*

To explore GPs' perceptions towards use of four digital health services for citizens: an electronic booking service to make reservations with the GP; an electronic prescription service to request renewal of maintenance drugs; a service for text-based non-clinical enquiries to the GP office and a service for text based electronic consultation (e-consultation) with the GP.

### *Design*

A qualitative study based on semi-structured interviews.

### *Setting*

Primary Care

### *Participants*

Nine GPs from that were early adopters of the four services were interviewed.

### *Method*

One moderator presented topics using open-ended questions, facilitated the discussion and followed up with further questions. Phone interviews were conducted, audio recorded and transcribed verbatim. Qualitative data were analysed using the Framework Method.

### *Results*

The use of digital services in primary care in Norway is growing, although the use of text-based e-consultations is still limited. Most GPs were positive about all four services, but there was still some scepticism regarding their effects. Advantages for GP offices included reduced phone load, increased efficiency, released time for medical assessments, less crowded waiting rooms and more precise communication. Benefits for patients were increased flexibility and autonomy and time and money savings. Children, the elderly and people with low computer literacy might still need traditional alternatives.

## 1 *Conclusions*

2 More defined and standardised routines, as well as more evidence of the effects, are necessary  
3 for large-scale adoption.

## 4 **Strengths and limitations of this study**

### 5 Strengths:

- 6 - The study investigates technology implementation in general practice.
- 7 - Rigorous application of qualitative framework theory.
- 8 - The results highlight themes that are relevant for clinicians and policy-makers.

### 9 Limitations:

- 10 - All GPs who participated in the study were voluntary early adopters, and thus  
11 possibly more positive and competent with technology than the average GP  
12 population.

## 14 **Introduction**

15 All GPs participating in this study are private practitioners who have established a contractual  
16 agreement with the municipality in which their practice serves the population. They are  
17 financed through a variety of grants and reimbursements from the public sector, as well as  
18 out-of-pocket payments (1). The organisation of GPs in the Norwegian public health care  
19 system is referred to as the “general practitioners scheme”. In an effort to provide citizens  
20 with a uniform portal for communicating with their GP, the Norwegian Directorate for e-  
21 health has developed the «Digital dialogue with the general practitioner», a suite of four  
22 online services. By July 2018, these services were offered by 186 GP offices, which were part  
23 of the public GP scheme (4732 GPs working in 1542 offices), in order to obtain user  
24 experiences prior to large-scale deployment. The four digital services are accessible to  
25 citizens from the private section of the national portal helsenorge.no. They are available after  
26 login and include:

- 27 1: an electronic booking service to make reservations with the GP
- 28 2: an electronic prescription service to request renewal of maintenance drugs, with direct  
29 integration with the electronic prescription system of pharmacies
- 30 3: a service for text-based, non-clinical enquiries to the GP office (e.g. opening hours, results  
31 from diagnostic tests)

1 4: a service for electronic consultation (e-consultation) with the GP.

2 The first three services are mainly administrative, geared towards introducing less time-  
3 consuming routines for both GP offices and patients, and free of charge for patients. E-  
4 consultation is a clinical service, which requires patients to pay the same out-of-pocket fee as  
5 for office visits. GPs are free to offer patients all four of the services or only some of them.  
6 The portion of the population with Internet access in Norway is very high, and almost total in  
7 the younger part of the population (2). It is therefore possible to assume that these electronic  
8 services have a large potential user base.

9 Being the only clinical service in the suite, the e-consultation service warrants a more detailed  
10 description. The service is a text-based service that is available on the same web page as the  
11 rest of the services. The patients initiate an e-consultation by logging into a level 4 security  
12 portal, where a written message can be sent to the GP. The message arrives in the GP's  
13 electronic patient record system, and can then be answered. The service currently offered in  
14 the present study conforms to the definition that e-consultation is an asynchronous, non-face-  
15 to-face consultation using a secure electronic communication platform (3), where the doctor  
16 answers clinical questions in a similar way to a standard consultation and answers are sent  
17 electronically (4). The demand for services that enable digitally based communication  
18 between the patients and their GPs is not new and has been around since the early days of the  
19 Internet (5). While the use of online services in health care is on the rise, it is unclear whether  
20 it benefits all socioeconomic segments of the population (6). E-consultations in primary care  
21 have been mostly used to increase access to specialist care (7-10). However, the proliferation  
22 of e-consultations and other digital health services used by citizens to communicate directly  
23 with their GPs is limited, and consequently the body of literature from which to draw direct  
24 comparisons is narrow.

25 The presented suite of digital health services for citizens has the potential to improve the  
26 accessibility and efficiency of primary health care. However, government and vendors have  
27 been criticised for being overly optimistic about the expected favourable outcomes from  
28 employing health informatics (11). In order to release some of the potential of health  
29 informatics systems, it has been argued that, among others, feature functionality, project  
30 management and user-related outcomes affect implementation outcomes (12). The aim of the  
31 present study was to explore GPs' perceptions towards use of digital health services for  
32 citizens in primary care. Three main research questions were addressed: 1) which routines  
33 were implemented by GPs who adopted digital health services for citizens? 2) What were

1  
2  
3 1 GPs' impressions of benefits and disadvantages of digital health services for citizens? 3) How  
4 2 did GPs use digital health services for citizens?  
5  
6  
7 3

#### 9 4 **Methods**

##### 10 5 *Patient and Public involvement*

11 6 The present study did not have patient involvement. All participants were voluntary medical  
12 7 professionals (GPs). The results will be distributed to the study participants via e-mail mailing  
13 8 lists that include both study participants and other GPs that did use the four services.

##### 14 9 *Ethics*

15 10 According to the Norwegian Act on Medical and Health Research §2 and §4, the study did not  
16 11 require approval from the regional ethics committee (REK), but the procedure for handling  
17 12 the data was approved by the Data Protection Officer of the University Hospital of North  
18 13 Norway.

##### 19 14 *Data collection*

20 15 We conducted semi-structured interviews with GPs who adopted at least one of the four  
21 16 digital services. Some GPs adopted the services since their early introduction in 2015, some  
22 17 started using the services in 2016, while others adopted them only a few months before the  
23 18 present study was conducted. We aimed to include 8-12 GPs, and conducted interviews until  
24 19 we observed that interviewees began to repeat themes. After nine interviews, we decided that  
25 20 the additional insight gained from each additional interview was diminishing, and concluded  
26 21 that data saturation had been reached (13) for the main analytical categories.

27 22 A semi-structured interview guide was used to illustrate GPs' perceptions towards use of  
28 23 digital health services for citizens. The interview guide was developed with a number of  
29 24 questions for each of the four digital health services, as well as containing a few questions of  
30 25 a more general nature. Some questions were previously tested in a pilot qualitative study on  
31 26 the use of e-consultations. Consequently, the content of the interview guide was modified to  
32 27 include the feedback collected during the pilot study.

33 28 One moderator (AJF), who did not have any relationship with the interviewees beforehand,  
34 29 conducted the interviews. The moderator presented topics using the open-ended questions in  
35 30 the interview guide, facilitated the discussion and followed up with further questions. The  
36 31 interviewees could discuss their experiences freely. The moderator also sought to summarise  
37 32 discussions around each topic to verify interpretations of the GPs' answers. The interviews

1 were conducted by phone due to long distances to GPs' offices. Interviews were audio  
2 recorded and transcribed verbatim in Norwegian. Quotes relevant for this paper were  
3 translated into English.

#### 4 *Data analysis*

5 Data were analysed by a multidisciplinary research team consisting of three members (AJF,  
6 IMH and PZ) with a background in psychology, social science and health technology.  
7 Qualitative data collected from the interviews were analysed using the Framework Method  
8 (14). After transcription of the audio recordings, a sample of two interviews was randomly  
9 selected to let the research team familiarise itself with the transcripts and develop initial  
10 impressions and potential ideas for codes. Transcripts were then thoroughly read and  
11 independently analysed by each member of the research team. Interesting segments of text  
12 were underlined and notes were made in the margins of the transcripts to describe the content  
13 of each passage with coding labels, as well as with more detailed information supporting the  
14 interpretation of the results. The members of the research team later met to share the coding  
15 labels, which they had assigned to the two transcripts. Each passage was analysed to discuss  
16 why it was interpreted as meaningful and how it could be useful to address the research  
17 questions. The coding labels used to describe each passage were compared to find similarities  
18 in the interpretations of the content and to resolve differences. Finally, a working analytical  
19 framework was developed around a set of codes that were explained by a short definition.

20 The remaining seven transcripts were then assigned to the three members of the research team  
21 and analysed using the analytical framework. New codes that were not included in the initial  
22 framework were assigned together with the already defined codes as additional impressions  
23 emerged. Regular team meetings were conducted during the process of analysing transcripts  
24 to discuss new codes, group together codes that were conceptually related, and to refine the  
25 initial analytical framework. The analytical framework was refined until no new codes were  
26 generated. The final analytical framework [**Table 1**] consisted of fifteen codes grouped into  
27 five categories, each including a brief explanatory description of their meaning.

28 The final analytical framework was applied to all the transcripts by assigning appropriate  
29 codes to each meaningful passage of text. Data were then summarised in a framework matrix  
30 using Microsoft Excel. The framework matrix consisted of one column per interviewee and  
31 one row per code. A separate sheet was used for each of the four digital health services  
32 explored in this study. Data from transcripts were summarised using verbatim words and  
33 inserted into the corresponding cell in the framework matrix. The qualitative data included in

1 the framework matrix were finally reviewed to make connections across interviewees and  
 2 categories and to identify common themes as well as individual differences (15). Results were  
 3 summarised and presented separately for each of the four digital health services.

4 **Table 1.** Framework matrix.

| Use                                   | Description                                            |
|---------------------------------------|--------------------------------------------------------|
| Extent of use                         | The extent to which the service is used by the staff   |
| Inappropriate use                     | When the service is not used correctly                 |
| Suitable for                          | Situations for which the service is most useful        |
| Unsuitable for                        | Situations for which the service cannot be used        |
| Motivation and incentives             | Factors affecting users' motivation to use the service |
| Routines                              |                                                        |
| Doctor's office                       | How the office is organised around the service         |
| General practitioners and staff       | How the service is integrated into individual routines |
| Advantages                            |                                                        |
| Doctor's office                       | The main benefits for the staff of the doctor's office |
| Patients                              | The main benefits for the patients                     |
| Disadvantages                         |                                                        |
| Criticisms and potential improvements | Organisational problems regarding the service delivery |
| Technical challenges and limitations  | Technical problems regarding the service functionality |
| Time and efficiency                   | Impact of the service on the staff's productivity      |
| Economics                             | Economic impact of the service                         |
| Other issues                          |                                                        |
| Perceptions                           | Individual thoughts around the service                 |
| Written communication                 | Impact on the communication with patients              |

5

## 6 Results

7 Nine GPs from different offices [**Table 2**] were interviewed in the period from September  
 8 2017 to November 2017. Each interview lasted from 30 to 60 minutes.

9 **Table 2.** Participants

| ID  | GENDER | AGE GROUP (YEARS) | HEALTH REGION | DISTANCE TO NEAREST HOSPITAL (KM) | POPULATION OF MUNICIPALITY (2018) |
|-----|--------|-------------------|---------------|-----------------------------------|-----------------------------------|
| GP1 | Male   | 60-69             | South Eastern | 34                                | <50k                              |
| GP2 | Male   | 50-59             | South Eastern | 7                                 | 50-100k                           |
| GP3 | Female | 30-39             | South Eastern | 7                                 | 50-100k                           |
| GP4 | Male   | 60-69             | Western       | 3                                 | 100-200k                          |
| GP5 | Male   | 40-49             | South Eastern | 5                                 | 100-200k                          |
| GP6 | Male   | 40-49             | Western       | 18                                | <50k                              |
| GP7 | Female | 60-69             | Western       | 1                                 | 200-300k                          |
| GP8 | Male   | 50-59             | Western       | 10                                | 200-300k                          |
| GP9 | Male   | 40-49             | South Eastern | 23                                | 100-200k                          |

10 Table shows participant demographics.

### 11 *Electronic booking*

12 The amount of appointments available for electronic booking (e-booking) varied among  
 13 practices. One GP office began by having all time slots open for e-bookings. However, the

1  
2  
3 1 procedure was modified by keeping some time slots unavailable for e-booking in order to  
4 2 have more flexibility for patients who preferred to book in person or by phone. Other GP  
5 3 offices decided to restrict specific time slots to meetings or administrative work.

8  
9 4 «[...] sometimes there are time slots available for regular appointments, but not for e-  
10 5 bookings»

12  
13 6 One GP office has not adopted e-booking yet due to limitations in managing different lists of  
14 7 patients for GPs of the same practice. The demand for e-booking was especially high among  
15 8 technology-oriented patients. The extent to which e-booking was available also varied among  
16 9 GP offices. Some GPs published all time slots six months in advance, while others only  
17 10 offered one month ahead. Requests for emergency appointments were generally not available  
18 11 through the service.

23  
24 12 Despite different routines, GPs agreed that e-booking had obvious benefits and perceived the  
25 13 service as effective and timesaving. Reduced phone load was emphasised as a significant gain  
26 14 from several GPs. One of the GPs reported that he had performed a measurement that  
27 15 indicated about a quarter reduction in telephone load. Consequently, the staff had more time  
28 16 available for other important tasks. Reduced phone load also brought benefits for less  
29 17 technology-oriented patients, who prefer regular phone-booking. According to the GPs,  
30 18 patients considered e-booking useful and preferable to regular booking, mainly due to time  
31 19 savings. Patients were also less dependent on GP offices' opening hours. Patients with a tight  
32 20 schedule experienced increased autonomy as it was easier for them to book an appointment  
33 21 online that fitted with their schedule. GPs mentioned only a few disadvantages. Experience  
34 22 showed that e-booking was not suitable for everyone. Children, elderly, people not familiar  
35 23 with technology as well as some patients receiving psychiatric care were examples of patients  
36 24 who might require traditional booking alternatives. Moreover, GPs had less information on  
37 25 patients' reasons for requesting an appointment when the booking was made electronically.

48  
49 26 GPs were generally satisfied with using e-booking for regular appointments, and were  
50 27 positive about the potential use for emergency appointments.

52  
53 28 «Doctors are generally sceptical about making emergency appointments available for  
54 29 e-booking, but we actually have a positive experience of this. The service is seldom used  
55 30 improperly».

57  
58 31 The users of e-booking highlighted a number of limitations. For instance, when GPs made  
59 32 changes, these were not updated and visible until the next day. Another drawback was the

1  
2  
3 1 impossibility of filtering unnecessary appointments in the same way as by phone, or  
4  
5 2 modifying the required time for appointments. One GP highlighted some challenges in using  
6  
7 3 same-day appointments, available for booking from 4 PM the day before.

8  
9 4 *«It takes time for patients to understand this, so when looking for a time slot two days in  
10  
11 5 advance, they can't find it. Then they try to book an appointment with another doctor,  
12  
13 6 despite there being many time slots available with their own doctor. But we have always  
14  
15 7 been concerned with explaining concepts and educating citizens on how to do this».*

16  
17 8 Improper use rarely occurred. When using e-booking, most patients generally booked single  
18  
19 9 appointments, even if they might need a double appointment. GPs found it easier to clarify  
20  
21 10 such matters by regular phone booking and missed the option of e-booking double  
22  
23 11 appointments. Another challenge mentioned was the inappropriate request for vaccination.

### 24 25 26 13 *Electronic prescription renewal*

27  
28 14 GPs adopted different procedures for handling electronic prescription (e-prescription)  
29  
30 15 renewals. Some GP practices made new requests available in a common inbox that was  
31  
32 16 checked daily, thus ensuring that renewals were processed even if the responsible GP was  
33  
34 17 absent. One GP preferred to process all e-prescriptions by himself, while another interviewee  
35  
36 18 delegated them to a medical secretary. GPs processed requests between consultations or at the  
37  
38 19 end of the day, sometimes requiring overtime work.

39 20 *«In the way the GP scheme has been evolving, we may have ended up with more work in  
40  
41 21 the evenings».*

42  
43 22 GPs mentioned a number of benefits of e-prescription, including fewer incoming calls,  
44  
45 23 increased efficiency in administration resulting in freed up time for medical assessments, less  
46  
47 24 pressure in the waiting room and in the GP office, improved dispatching priority and more  
48  
49 25 precise communication.

50 26 *«Fewer phone calls is probably the main advantage in addition to less hassle in  
51  
52 27 notifying that a prescription is ready, for instance».*

53  
54 28 Obvious advantages for patients were, according to GPs, time and money savings because  
55  
56 29 they did not have to show up at the GP office to renew a prescription. However, one GP  
57  
58 30 thought that it could become too easy to renew a prescription for patients who should have  
59  
60 31 had a prescription review. The service could potentially involve additional work for GPs if

1 they needed to explain patients why a renewal was refused, access their medical records and  
2 look up former use of medication, or receive many prescription requests at the same time.  
3 Another GP thought that the interface was slow.

4 *«The number of clicks and processes was somewhat easier - a bit easier than (the  
5 previously used) SMS-service. However, if you look at the doctor's work involved in  
6 managing the service in relation to attending patients, we spend more time.»*

7 The service was perceived by most GPs as best suited to renewals for chronic patients on  
8 complex medication schemes.

9 *«E-prescribing [...] provides a much more complete overview of when patients took  
10 their medicine. This makes it easier for other doctors in the system to follow up».*

11 Some GPs believed the service could be an effective solution for “simple” infections,  
12 frequently prescribed medications such as benzodiazepine and sporadic medications such as  
13 painkillers and allergy medications. The GPs were somewhat divided regarding the  
14 prescription of potentially addictive medication.

15 *«Ideally, addictive medications of benzodiazepine should not be renewed like this, but it  
16 depends on each situation».*

17 However, other GPs held a different position regarding medications used for long-term  
18 treatment.

19 *«Frequently prescribed medications taken daily for chronic diseases are renewed once  
20 a year at a yearly control. There we can see [...] if there is anything to change [...].  
21 Renewal by electronic prescription removes the possibility for adjustment. [...] it is best  
22 suited for those medications that are easy for people to keep control of and understand  
23 when they should consult their doctor if there is something that isn't working well, such  
24 as recurrent urinary tract infections».*

## 25 26 *E-consultation*

27 The service was only used to a limited extent by the patients. GPs reported 1-2 e-consultations  
28 per day, which occurred in the form of a dialogue between patient and GP. E-consultations  
29 were used for remote follow-up of health problems previously discussed during in-visits.  
30 Through an e-consultation, a GP could adjust a treatment, prescribe referrals or provide

1  
2  
3 1 information. GPs could also assess, for example, signs of eczema upon receiving pictures  
4 2 electronically.

5  
6  
7 3 *«It should be a known problem, of a medical nature and regarding a known patient»*

8  
9 4 GPs were generally satisfied about how much could be done without an office visit.

10  
11 5 *«Far better than I thought, depending on how well the patient describes the problem*  
12 6 *[...] Perhaps 20-30% of the situations require personal attendance»*

13  
14  
15 7 There were, however, cases in which e-consultations could not be used. These included newly  
16 8 emerged clinical problems, which could not be assessed remotely, as well as requests for sick  
17 9 leaves. Despite the requirements for e-consultations being well described, patients were more  
20 10 likely to use the service if motivated directly by their GP.

21  
22  
23 11 A request for e-consultation in this particular system must be replied to within five days. Most  
24 12 GPs reported internal routines according to which, in case of delays, other GPs from the same  
25 13 practice could handle those requests. In case of absence, a substitute was always assigned and  
26 14 information on leaves was updated. Routines varied among individual GPs, even if belonging  
27 15 to the same practice: e-consultations were processed during the time between visits, at lunch,  
30 16 at the end of the day or during the evening.

31  
32  
33 17 *«Some afternoon and evening work is often required. I try to answer continuously so*  
34 18 *that all requests are processed by the weekend. But if requests mount up, I can book*  
35 19 *time in my schedule»*

36  
37  
38  
39 20 Most GPs perceived a positive impact in terms of reduced workload for both receptionists and  
40 21 GPs, less crowded waiting rooms and fewer urgent visits. E-consultation was seen as a simple  
41 22 and secure communication channel with patients, especially with those who have a chronic  
42 23 condition. This enabled a more efficient exchange of information, which was also  
43 24 documented in the electronic patient journal.

44  
45  
46  
47 25 *«An e-consultation makes it much easier to have a good conversation around the*  
48 26 *follow-up of health problems»*

49  
50  
51  
52 27 Another benefit that was perceived by many GPs was improved patient follow-up via e-  
53 28 consultations due to the higher availability of the GPs. GPs also agreed that some patients  
54 29 managed to express themselves more openly on health issues through e-consultations.

55  
56  
57  
58 30 *«One patient wrote to me about issues he had never told anyone about before»*  
59  
60

1  
2  
3 1 Despite the benefits of e-consultations, GPs mentioned that this service could not always  
4  
5 2 replace regular visits. One limitation, for instance, was unclear communication.

6  
7 3 *«Sometimes it's not possible to understand the patient»*

8  
9 4 Use of e-consultations could imply additional work, especially after traditional working hours.  
10  
11 5 Another limitation was that GPs could not initiate an e-consultation. In general, GPs were  
12  
13 6 satisfied with the functionality of the platform, which made processing of e-consultations  
14  
15 7 effective. A number of technical solutions was suggested to improve the service, such as the  
16  
17 8 ability to process the electronic transmission of files and images. GPs also recommended a  
18  
19 9 feature to disable the service in their absence, and the option for patients to choose between  
20  
21 10 different GPs. E-consultations via videoconferencing was seen as the next step.

22 11 *«Perhaps in the future we could offer patients a videoconferencing service»*

23  
24 12

25  
26 13 *Electronic contact with the GP office (e-contact)*

27  
28 14 Use of the service differed among GP offices. Those that had just started using the service  
29  
30 15 received only a few contacts daily, while others with a longer experience answered up to 20-  
31  
32 16 30 requests. The service was used to reschedule appointments, respond regarding blood tests  
33  
34 17 or digital imaging, provide information about vaccines, payments or to simple treatment-  
35  
36 18 related advice. There were, however, situations of inappropriate use, especially when patients  
37  
38 19 used electronic contact with the GP office to address clinical questions. One reason might be  
39  
40 20 related to unclear information regarding proper use. Another reason might be that, while this  
41  
42 21 service was free of charge for patients, e-consultations had a fee. When such situations  
43  
44 22 occurred, the office redirected the requests.

45  
46 23 E-contact with the GP office was used about as much as e-consultations. As the service was  
47  
48 24 new, no formal routines had been established yet. Offices were still struggling to define  
49  
50 25 boundaries between e-contacts and e-consultations. With the purpose of making the service  
51  
52 26 more efficient and standardised, patients' requests were categorised by the clinical staff.

53  
54 27 The main advantage for the GP office consisted of a reduction in the number of visits and  
55  
56 28 phone contacts, which, in return, resulted in less waiting time for patients calling the office, as  
57  
58 29 well as less workload for the clinical staff.

59 30 *«I think it's easier to give an answer [...] It's quick, and it's done without mail or*  
60 31 *phone. Because if you call people, they will talk about more. Now you can send a short*

1  
2  
3 1 *reply, so the frequency is actually increasing now. It makes it a little easier to follow up*  
4  
5 2 *and keep a close dialogue»*  
6

7 3 Interviewees indicated that the service saved time for patients by avoiding unnecessary  
8  
9 4 waiting time spent on the phone. Moreover, a less busy phone line had a positive effect on  
10  
11 5 patients who still needed to call the office. Another benefit was that, unlike phone contacts, e-  
12  
13 6 contacts were documentable.

14 7 GPs were overall satisfied with the service and its functionalities. The only major limitation  
15  
16 8 was related to uncertainties among patients on whether to use e-contact or e-consultation. In  
17  
18 9 this respect, the service should be improved with more clear information.

19  
20 10 E-contacts were considered an alternative to phone contacts. Consequently, this service had a  
21  
22 11 high potential of increasing efficiency and reducing workload. Younger patients with higher  
23  
24 12 computer literacy could benefit more from this service.

25  
26 13 *«Someone will always use the phone instead of electronic contact, such as older people. The*  
27  
28 14 *younger population will probably like it, and I hope they will use it more»*  
29

30 15 Finally, GPs were satisfied with the economic implications. The service did not require any  
31  
32 16 additional cost, but it succeeded in releasing time for the health staff. The only concern was  
33  
34 17 related to situations in which GPs provided answers to clinical requests without charging the  
35  
36 18 fee for an e-consultation.

37 19

## 39 20 **Discussion**

### 41 21 *Summary*

42  
43  
44 22 Use of digital services for citizens in primary care in Norway is increasing. Use of text-based  
45  
46 23 e-consultations is in the early adoption phase and therefore in limited use.

47  
48 24 The most commonly reported advantages for the GP office include reduced phone load,  
49  
50 25 increased efficiency in administration and consequently more time for medical assessments,  
51  
52 26 less crowded waiting rooms and more precise communication. Clear advantages for patients  
53  
54 27 are ease of use, increased flexibility, increased autonomy and time and money savings.

55 28 However, some GPs raised concern that children, the elderly, people unfamiliar with  
56  
57 29 technology and some patients receiving psychiatric care were examples of patients who  
58  
59  
60

1  
2  
3 1 required traditional face-to-face alternatives. There is still some scepticism about the effects in  
4 2 terms of efficiency and clinical utility for e-consultations.

6  
7 3 *Comparison with existing literature*

8  
9 4 GPs' perceptions towards e-booking and e-prescription renewal were almost entirely positive.  
10 5 Suggestions on how to improve the services included, for example, filtering of unnecessary  
11 6 bookings and the option to e-book double appointments. Some GPs noted that the e-contact  
12 7 with the GP office was sometimes confused with e-consultations by the patients. However,  
13 8 this tendency was not overwhelming. E-consultation was the only service entirely intended for  
14 9 clinical use. While the administrative services were implemented to a larger extent, the use of  
15 10 e-consultations by patients was still limited. Notably, some GPs expressed surprise that the  
16 11 clinical utility of e-consultations was better than expected. While it is demonstrated that  
17 12 written consultations between primary and specialist health have several benefits (7, 16), less  
18 13 is known about how text-based communication between GPs and patients affects clinical  
19 14 practice.

20 15 The experiences from early large-scale implementation in Sweden indicated that the use of  
21 16 digital services might increase over time after they are made available (17). In the present  
22 17 study, a common impression among the GPs was that the initial volume of use for text-based  
23 18 e-consultations appeared to be limited. They also appeared to have little impact on demand for  
24 19 physical consultations, as the available appointments for physical consultations were still fully  
25 20 booked. Another study has pointed out that written communication between GP and patient  
26 21 can both supplement and replace physical consultations (18). In this study, however, an out-  
27 22 of-pocket fee was not charged for using the service, making a direct comparison with the  
28 23 service investigated in the present study questionable. The qualitative scope of the present  
29 24 study is not suited to detecting non-obvious changes in demand and, consequently, cannot rule  
30 25 out the possibility that e-consultations affected physical consultations. Because of limited use  
31 26 from the patients, the need to implement new routines in the clinic in order to handle e-  
32 27 consultations were modest, and the requests were often processed between physical visits, at  
33 28 lunch or outside regular office hours. It is likely that an increase in use of the service would  
34 29 require the implementation of more rigorous routines in the GPs' offices, such as by  
35 30 allocating a set portion of the office hours to handling electronic consultations. A recent study  
36 31 highlighted that GPs can be reluctant to implement alternatives to face-to-face consultations,  
37 32 despite policy pressure (19). We did not observe this reluctance in the present study, possibly

1  
2  
3 1 due to the characteristics of the GPs included in the study, which are pointed out in the  
4  
5 2 strengths and limitations section.

6  
7 3 *Strengths and limitations*

8  
9 4 This study employed a rigorous methodology for classifying and coding responses, reducing  
10  
11 5 the impact of the authors' presumptions on the results. A limitation in this study was that the  
12  
13 6 informants were recruited from a group of voluntary early adapters, who may have been more  
14  
15 7 enthusiastic than the general GP population. It is also possible that the informant group had  
16  
17 8 higher technology proficiency or that they were less sensitive to annoyances than GPs in  
18  
19 9 general.

20 10 *Implications for research and/or practice*

21  
22 11 There were different routines among GP offices and even among individual GPs from the  
23  
24 12 same practice. Organisational practices have a direct impact on the use of the service by GPs,  
25  
26 13 as well as on their perception of the effects. More experience is needed to standardise  
27  
28 14 routines.

29  
30 15 More defined and standardised routines, as well as more evidence of the effects, are necessary  
31  
32 16 for large-scale adoption of digital health services for citizens in primary care.

33 17 **Additional information**

34  
35  
36 18 Funding: This study was funded by the Norwegian Centre for E-health Research as part of the  
37  
38 19 project "Nytteeffektene av digitale helsetjenester".

39  
40 20 Ethical approval: Not relevant.

41  
42 21 Competing interests: The authors declare no conflict of interests.

43  
44 22 Acknowledgements: We would like to thank the general practitioners sharing their valuable  
45  
46 23 experiences as early adopters of the services.

47  
48 24 Data availability: No additional data available.

49  
50 25 Author statement: Fagerlund conducted the data collection. The authors Fagerlund, Holm and  
51  
52 26 Zanaboni contributed equally in the analysis of the results and the preparation of the  
53  
54 27 manuscript.

55 28

56  
57 29

58  
59 30

60

### References

1. Norwegian Directorate of Health, Norway and Health: an introduction. 2011.
2. SSB, Statistics Norway, Information technology use in households. 2016 [Available from: <https://www.ssb.no/teknologi-og-innovasjon/statistikker/ikthus/aar/2016-09-06>].
3. Olayiwola JN, Anderson D, Jepeal N, Aseltine R, Pickett C, Yan J, et al. Electronic consultations to improve the primary care-specialty care interface for cardiology in the medically underserved: a cluster-randomized controlled trial. *Ann Fam Med*. 2016;14(2):133-40.
4. Pecina JL, North F. Early e-consultation face-to-face conversions. *J Telemed Telecare*. 2016;22(5):269-76.
5. Ferguson T. Digital doctoring—opportunities and challenges in electronic patient-physician communication. *JAMA*. 1998;280(15):1361-2.
6. Miller EA, West DM. Where's the revolution? Digital technology and health care in the internet age. *J Health Polit Policy Law*. 2009;34(2):261-84.
7. Keely E, Liddy C, Afkham A. Utilization, benefits, and impact of an e-consultation service across diverse specialties and primary care providers. *Telemed J E Health*. 2013;19(10):733-8.
8. Liddy C, Maranger J, Afkham A, Keely E. Ten steps to establishing an e-consultation service to improve access to specialist care. *Telemed J E Health*. 2013;19(12):982-90.
9. North F, Uthke LD, Tullidge-Scheitel SM. Internal e-consultations in an integrated multispecialty practice: a retrospective review of use, content, and outcomes. *J Telemed Telecare*. 2015;21(3):151-9.
10. Tran C, Liddy C, Pinto N, Keely E. Impact of question content on e-consultation outcomes. *Telemed J E Health*. 2016;22(3):216-22.
11. Himmelstein DU, Woolhandler S. Hope and hype: predicting the impact of electronic medical records. *Health Aff*. 2005;24(5):1121-3.
12. Ludwick DA, Doucette J. Adopting electronic medical records in primary care: Lessons learned from health information systems implementation experience in seven countries. *Int J Med Inform*. 2009;78(1):22-31.

- 1  
2  
3 1 13. Saunders B, Sim J, Kingstone T, Baker S, Waterfield J, Bartlam B, et al. Saturation in  
4 qualitative research: exploring its conceptualization and operationalization. *Qual Quant*.  
5 2 2018;52(4):1893-907.  
6 3  
7 8  
8 4 14. Gale NK, Heath G, Cameron E, Rashid S, Redwood S. Using the framework method  
9 for the analysis of qualitative data in multi-disciplinary health research. *BMC Med Res*  
10 5 *Methodol*. 2013;13(1):117.  
11 6  
12 7 15. Braun V, Clarke V. Using thematic analysis in psychology. *Qual Res Psychol*.  
13 8 2006;3(2):77-101.  
14 9  
15 9 16. Vimalananda VG, Gupte G, Seraj SM, Orlander J, Berlowitz D, Fincke BG, et al.  
16 Electronic consultations (e-consults) to improve access to specialty care: A systematic review  
17 10 and narrative synthesis. *J Telemed Telecare*. 2015;21(6):323-30.  
18 11  
19 12 17. Umefjord G, Sandström H, Malaker H, Petersson G. Medical text-based consultations  
20 12 on the Internet: A 4-year study. *Int J Med Inform*. 2008;77(2):114-21.  
21 13  
22 14 18. Kummervold PE, Trondsen M, Andreassen H, Gammon D, Hjortdahl P. [Patient-  
23 15 physician interaction over the internet]. *Tidsskr Nor Laegeforen*. 2004;124(20):2633-6.  
24 16  
25 16 19. Brant H, Atherton H, Ziebland S, McKinstry B, Campbell J L, Salisbury C. Using  
26 17 alternatives to face-to-face consultations: a survey of prevalence and attitudes in general  
27 18 practice. *Br J Gen Pract*. bjgpJul-2016  
28 19  
29  
30  
31  
32  
33  
34  
35  
36  
37  
38  
39  
40  
41  
42  
43  
44  
45  
46  
47  
48  
49  
50  
51  
52  
53  
54  
55  
56  
57  
58  
59  
60

## Standards for Reporting Qualitative Research (SRQR)\*

<http://www.equator-network.org/reporting-guidelines/srqr/>

Page/line no(s).

### Title and abstract

|                                                                                                                                                                                                                                                              |     |
|--------------------------------------------------------------------------------------------------------------------------------------------------------------------------------------------------------------------------------------------------------------|-----|
| <p><b>Title</b> - Concise description of the nature and topic of the study Identifying the study as qualitative or indicating the approach (e.g., ethnography, grounded theory) or data collection methods (e.g., interview, focus group) is recommended</p> | 1/1 |
| <p><b>Abstract</b> - Summary of key elements of the study using the abstract format of the intended publication; typically includes background, purpose, methods, results, and conclusions</p>                                                               | 2/5 |

### Introduction

|                                                                                                                                                                     |      |
|---------------------------------------------------------------------------------------------------------------------------------------------------------------------|------|
| <p><b>Problem formulation</b> - Description and significance of the problem/phenomenon studied; review of relevant theory and empirical work; problem statement</p> | 4/22 |
| <p><b>Purpose or research question</b> - Purpose of the study and specific objectives or questions</p>                                                              | 4/29 |

### Methods

|                                                                                                                                                                                                                                                                                                                                                                                                             |           |
|-------------------------------------------------------------------------------------------------------------------------------------------------------------------------------------------------------------------------------------------------------------------------------------------------------------------------------------------------------------------------------------------------------------|-----------|
| <p><b>Qualitative approach and research paradigm</b> - Qualitative approach (e.g., ethnography, grounded theory, case study, phenomenology, narrative research) and guiding theory if appropriate; identifying the research paradigm (e.g., postpositivist, constructivist/ interpretivist) is also recommended; rationale**</p>                                                                            | 6/3       |
| <p><b>Researcher characteristics and reflexivity</b> - Researchers' characteristics that may influence the research, including personal attributes, qualifications/experience, relationship with participants, assumptions, and/or presuppositions; potential or actual interaction between researchers' characteristics and the research questions, approach, methods, results, and/or transferability</p> | 5/24, 6/1 |
| <p><b>Context</b> - Setting/site and salient contextual factors; rationale**</p>                                                                                                                                                                                                                                                                                                                            | 5/28      |
| <p><b>Sampling strategy</b> - How and why research participants, documents, or events were selected; criteria for deciding when no further sampling was necessary (e.g., sampling saturation); rationale**</p>                                                                                                                                                                                              | 5/14      |
| <p><b>Ethical issues pertaining to human subjects</b> - Documentation of approval by an appropriate ethics review board and participant consent, or explanation for lack thereof; other confidentiality and data security issues</p>                                                                                                                                                                        | 5/6       |
| <p><b>Data collection methods</b> - Types of data collected; details of data collection procedures including (as appropriate) start and stop dates of data collection and analysis, iterative process, triangulation of sources/methods, and modification of procedures in response to evolving study findings; rationale**</p>                                                                             | 5/29      |

|                       |                                                                                                                                                                                                                                                       |              |
|-----------------------|-------------------------------------------------------------------------------------------------------------------------------------------------------------------------------------------------------------------------------------------------------|--------------|
| 1<br>2<br>3<br>4<br>5 | <b>Data collection instruments and technologies</b> - Description of instruments (e.g., interview guides, questionnaires) and devices (e.g., audio recorders) used for data collection; if/how the instrument(s) changed over the course of the study | 5/25         |
| 6<br>7<br>8           | <b>Units of study</b> - Number and relevant characteristics of participants, documents, or events included in the study; level of participation (could be reported in results)                                                                        | 5/11, table2 |
| 9<br>10<br>11<br>12   | <b>Data processing</b> - Methods for processing data prior to and during analysis, including transcription, data entry, data management and security, verification of data integrity, data coding, and anonymization/de-identification of excerpts    | 5/30         |
| 13<br>14<br>15<br>16  | <b>Data analysis</b> - Process by which inferences, themes, etc., were identified and developed, including the researchers involved in data analysis; usually references a specific paradigm or approach; rationale**                                 | 6/3          |
| 17<br>18<br>19<br>20  | <b>Techniques to enhance trustworthiness</b> - Techniques to enhance trustworthiness and credibility of data analysis (e.g., member checking, audit trail, triangulation); rationale**                                                                | 6/11         |

### Results/findings

|                      |                                                                                                                                                                                                   |                                |
|----------------------|---------------------------------------------------------------------------------------------------------------------------------------------------------------------------------------------------|--------------------------------|
| 23<br>24<br>25<br>26 | <b>Synthesis and interpretation</b> - Main findings (e.g., interpretations, inferences, and themes); might include development of a theory or model, or integration with prior research or theory | Table1                         |
| 27<br>28<br>29       | <b>Links to empirical data</b> - Evidence (e.g., quotes, field notes, text excerpts, photographs) to substantiate analytic findings                                                               | 8/1, throughout result section |

### Discussion

|                                  |                                                                                                                                                                                                                                                                                                                                                                                                             |       |
|----------------------------------|-------------------------------------------------------------------------------------------------------------------------------------------------------------------------------------------------------------------------------------------------------------------------------------------------------------------------------------------------------------------------------------------------------------|-------|
| 32<br>33<br>34<br>35<br>36<br>37 | <b>Integration with prior work, implications, transferability, and contribution(s) to the field</b> - Short summary of main findings; explanation of how findings and conclusions connect to, support, elaborate on, or challenge conclusions of earlier scholarship; discussion of scope of application/generalizability; identification of unique contribution(s) to scholarship in a discipline or field | 13/18 |
| 38<br>39                         | <b>Limitations</b> - Trustworthiness and limitations of findings                                                                                                                                                                                                                                                                                                                                            | 14/30 |

### Other

|                |                                                                                                                                               |       |
|----------------|-----------------------------------------------------------------------------------------------------------------------------------------------|-------|
| 42<br>43<br>44 | <b>Conflicts of interest</b> - Potential sources of influence or perceived influence on study conduct and conclusions; how these were managed | 15/11 |
| 45<br>46       | <b>Funding</b> - Sources of funding and other support; role of funders in data collection, interpretation, and reporting                      | 15/8  |

\*The authors created the SRQR by searching the literature to identify guidelines, reporting standards, and critical appraisal criteria for qualitative research; reviewing the reference lists of retrieved sources; and contacting experts to gain feedback. The SRQR aims to improve the transparency of all aspects of qualitative research by providing clear standards for reporting qualitative research.

1  
2  
3  
4  
5  
6  
7  
8  
9  
10  
11  
12  
13  
14  
15  
16  
17  
18  
19  
20  
21  
22  
23  
24  
25  
26  
27  
28  
29  
30  
31  
32  
33  
34  
35  
36  
37  
38  
39  
40  
41  
42  
43  
44  
45  
46  
47  
48  
49  
50  
51  
52  
53  
54  
55  
56  
57  
58  
59  
60

\*\*The rationale should briefly discuss the justification for choosing that theory, approach, method, or technique rather than other options available, the assumptions and limitations implicit in those choices, and how those choices influence study conclusions and transferability. As appropriate, the rationale for several items might be discussed together.

**Reference:**

O'Brien BC, Harris IB, Beckman TJ, Reed DA, Cook DA. **Standards for reporting qualitative research: a synthesis of recommendations.** *Academic Medicine*, Vol. 89, No. 9 / Sept 2014  
DOI: 10.1097/ACM.0000000000000388

For peer review only
